# Supplementary material for: A 2D quantum dot-based electrochemiluminescence film sensor towards reversible temperature-sensitive response and nitrite detection
Source: Royal Society of Chemistry journal article supplement (doi:10.1039/c5tc02002f), 2015-01-01
Supplement: c5tc02002f1.pdf [file c5tc02002f1.pdf]

**Electronic Supplementary Information for**  
**A 2D Quantum Dot-Based Electrochemiluminescence Thin Film Sensor**  
**towards Reversible Temperature-Sensitive Response and Nitrite**  
**Detection**

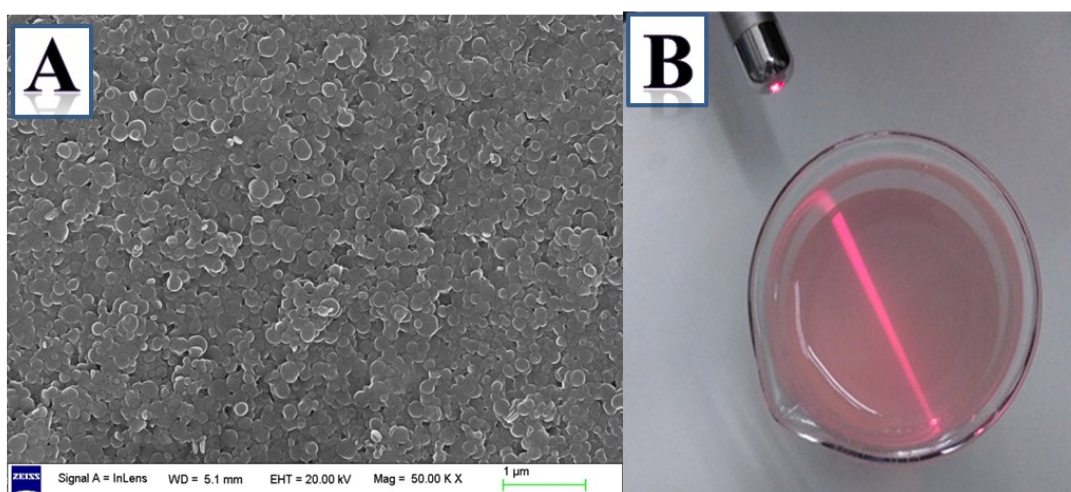

**Fig. S1** (A) SEM image of the CoAl-NO<sub>3</sub> LDH nanoplalelets; (B) Photograph of a colloidal suspension of CoAl-LDH nanoplalelets.

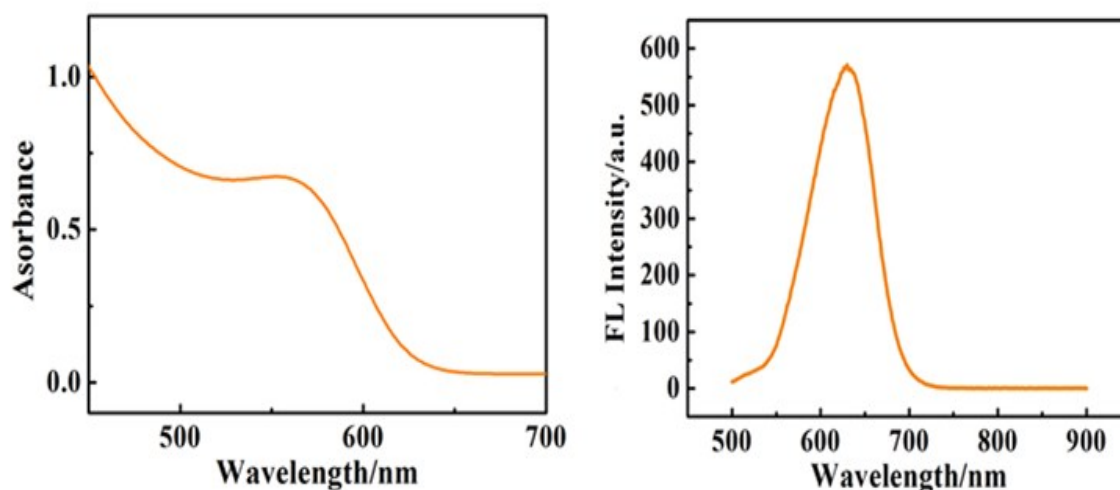

**Fig. S2** UV-vis absorption and fluorescence spectra of MSA-modified CdTe QDs solution.

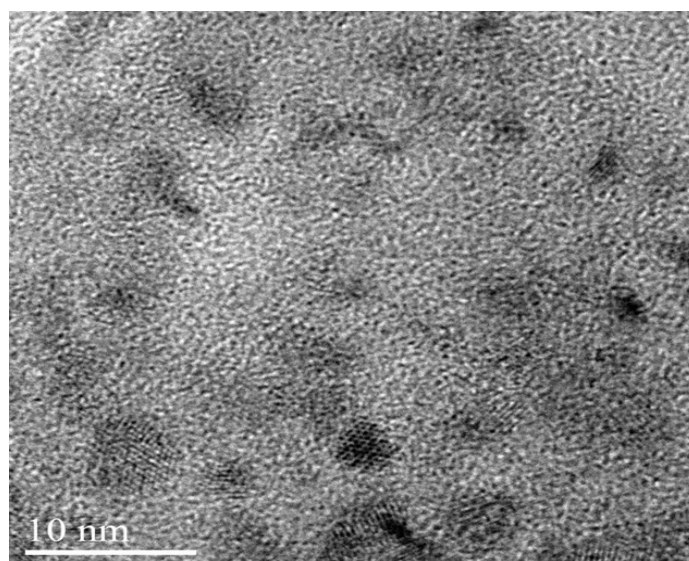

**Fig.S3** HRTEM image of the CdTe QDs.

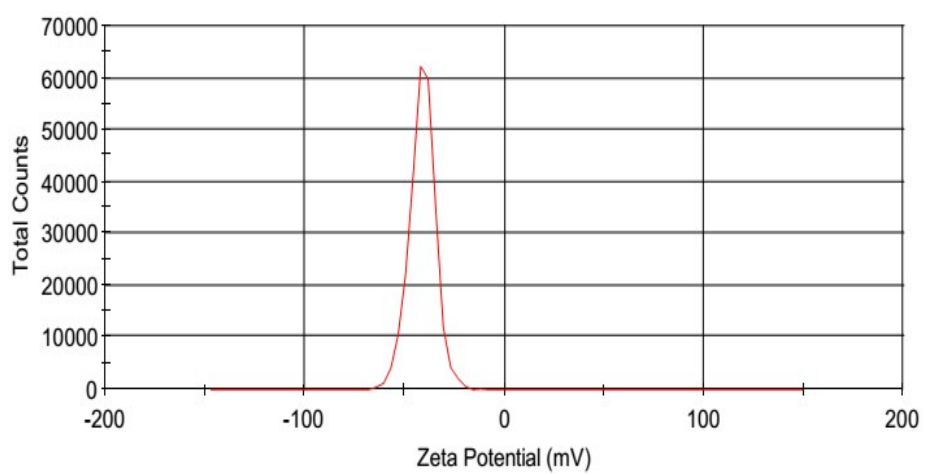

**Fig. S4** The Zeta potential distribution of CdTe QDs

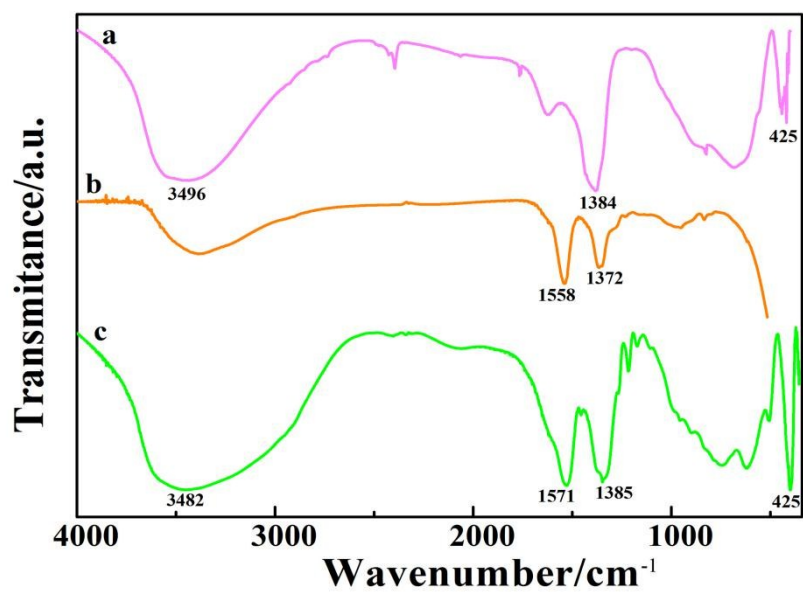

**Fig. S5** FT-IR spectra of a) CoAl-LDH, b) CdTe QDs, c) (CdTe-QDs/LDH)<sub>12</sub> TF

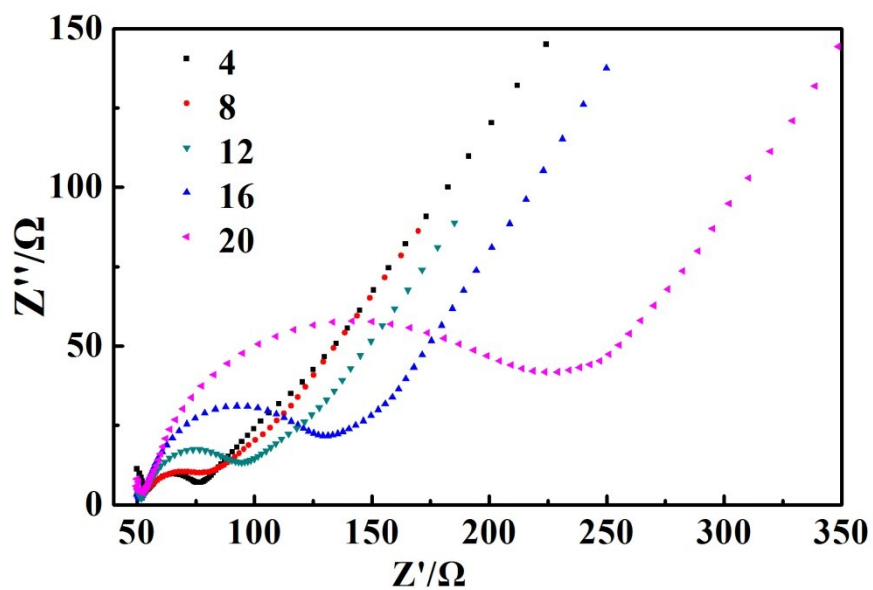

**Fig. S6** Nyquist plots of EIS for the (CoAl-LDH/CdTe QDs)<sub>n</sub>/ITO ( $n=4-20$ ) in 5 mM  $\text{Fe}(\text{CN})_6^{4-/3-}$  solution.

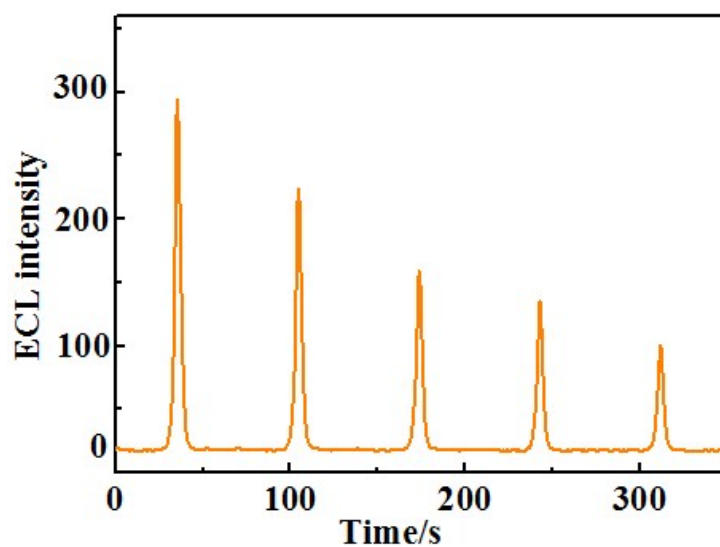

**Fig. S7.** ECL signal of drop-casted CdTe on ITO substrate

**Table S1** Detection limit and linear range of different methods for the detection of nitrite

| Technique          | System                                     | Linear range<br>( $\mu\text{mol/L}$ ) | LOD<br>( $\mu\text{mol/L}$ ) | Ref       |
|--------------------|--------------------------------------------|---------------------------------------|------------------------------|-----------|
| Electrochemical    | Polymer/carbon nanotubes                   | 1-400                                 | 0.1                          | [42]      |
| Fluorogenic sensor | Gold nanoparticles                         | 2-50                                  | 2                            | [43]      |
| Chemiluminescence  | Fluorosurfactant-capped gold nanoparticles | 1-100                                 | 0.36                         | [44]      |
| Electrochemical    | Nano-Au/P3MT/GCE                           | 1-1000                                | 1.4                          | [45]      |
| Chemiluminescence  | Carbon dots                                | 1-100                                 | 0.53                         | [46]      |
| Flow injection     | Phosphomolybdenum chemistry                | 0.72-16.7                             | 0.45                         | [47]      |
| Roman              | SERS of 4-ABT on Au                        | 5-25                                  | 5                            | [48]      |
| ECL sensor         | LDH/CdTe QDs                               | 1-10000                               | 0.719                        | This work |
